# Supplementary material for: Reducing voltage-dependent potassium channel Kv3.4 levels ameliorates synapse loss in a mouse model of Alzheimer’s disease
Source: PubMed Central journal article supplement (PMC8961358; doi:10.1177/23982128221086464), 2022-03-24
Supplement: sj-pdf-1-bna-10.1177_23982128221086464.pdf [file sj-pdf-1-bna-10.1177_23982128221086464.pdf]

**Supplementary table 1: Human brain samples used for western blot analysis**

|             | BBN       | Sex | Age | PMI (hours) | Braak Stage |
|-------------|-----------|-----|-----|-------------|-------------|
| Braak 0 - 1 | 001.35138 | F   | 73  | 74          | 0           |
|             | 001.34150 | M   | 63  | 115         | 0           |
|             | 001.35420 | F   | 82  | 114         | I           |
|             | 001.35215 | M   | 82  | 40          | I           |
|             | 001.31504 | F   | 65  | 76          | I           |
|             | 001.31503 | F   | 57  | 73          | I           |
|             | 001.28402 | M   | 79  | 49          | I           |
|             | 001.28794 | F   | 79  | 61          | I           |
|             | 001.30208 | M   | 73  | 66          | I           |
|             | 001.30178 | M   | 72  | 60          | 0           |
| Braak 3 - 4 | 001.32820 | F   | 69  | 94          | IV          |
|             | 001.29528 | F   | 93  | 31          | III         |
|             | 001.28411 | F   | 88  | 65          | III         |
|             | 001.28405 | M   | 84  | 83          | IV          |
|             | 001.26499 | F   | 81  | 59          | III         |
|             | 001.26491 | M   | 77  | 27          | III         |
|             | BBN_26492 | F   | 74  | 71          | IV          |
|             | BBN_24323 | M   | 67  | 103         | IV          |
|             | BBN_20994 | M   | 75  | 59          | III         |
|             | BBN_19600 | F   | 85  | 36          | III         |
| Braak 5 - 6 | 001.35183 | M   | 74  | 75          | VI          |
|             | 001.35096 | M   | 72  | 103         | VI          |
|             | 001.33698 | F   | 90  | 76          | VI          |
|             | 001.33636 | M   | 93  | 43          | VI          |
|             | 001.32929 | F   | 85  | 80          | VI          |
|             | 001.30883 | F   | 61  | 69          | VI          |
|             | 001.29911 | M   | 66  | 52          | VI          |
|             | 001.29521 | M   | 95  | 96          | VI          |
|             | 001.26500 | M   | 81  | 83          | VI          |
|             | BBN_24668 | F   | 96  | 61          | VI          |

**Supplementary Table 2: Sequences of qPCR primer pairs**

| PRIMER        | DIRECTION | SEQUENCE                 |
|---------------|-----------|--------------------------|
| <b>KV3.4a</b> | Forward   | TCCACCACTCGAGACAGAAACAAG |
|               | Reverse   | ATGTGGCAGGAACAGAGTCC     |
| <b>GAPDH</b>  | Forward   | CCAAGGTCATCCATGACAAC     |
|               | Reverse   | ACAGTCTTCTGGGTGGCAGT     |
| <b>RPLP1</b>  | Forward   | AGCCGGTGTAATGTTGAGC      |
|               | Reverse   | CAGATGAGGCTCCCAATGTT     |

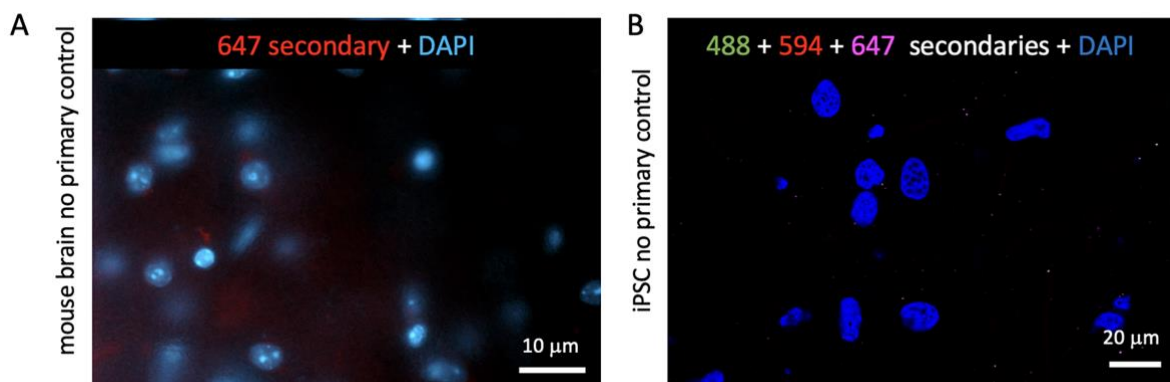

**Supplemental Figure 1:** No primary antibody negative controls for immunohistochemistry of mouse brain (A) and immunocytochemistry of iPSC derived neurons (B).

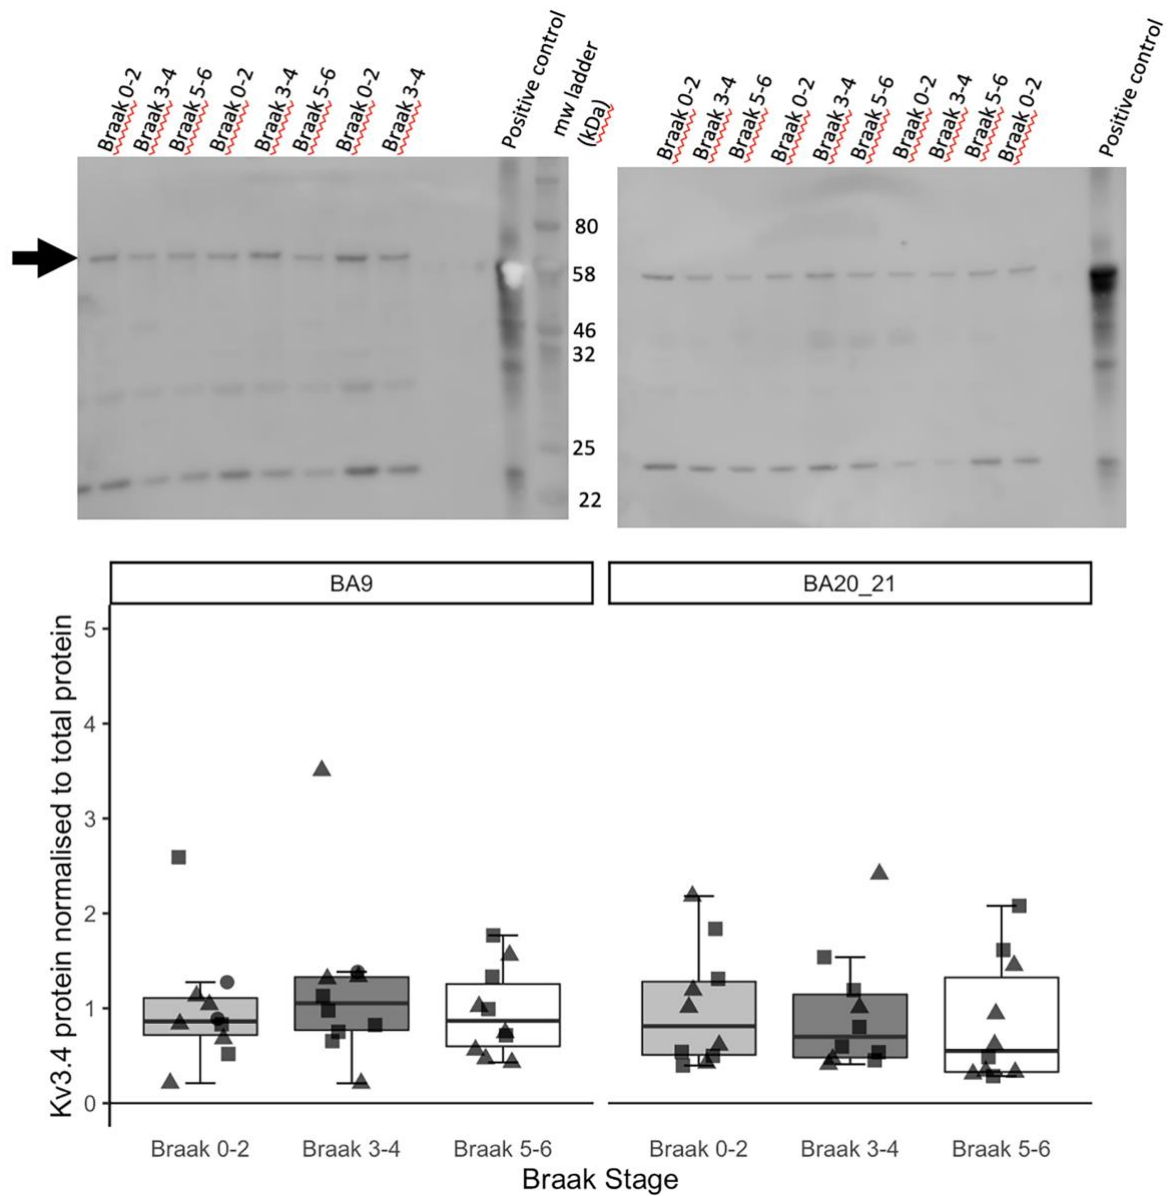

**Supplemental Figure 2:** Western blot of human brain samples from frontal (BA9) and temporal (BA20/21) cortex of people with low (Braak 0-2), moderate (Braak 3-4) and extensive (Braak 5-6) Alzheimer’s disease pathology reveals no difference between brain regions or Braak stages (n=10 per group, linear model on Tukey transformed data  $p > 0.05$  for all fixed effects). The arrow indicates full-length Kv3.4 protein immunoreactivity.
